# Supplementary material for: Polyphenol Rich Forsythia suspensa Extract Alleviates DSS-Induced Ulcerative Colitis in Mice through the Nrf2-NLRP3 Pathway
Source: MDPI journal article supplement (doi:10.3390/antiox11030475), 2022-02-28
Supplement: s1 [file s1]

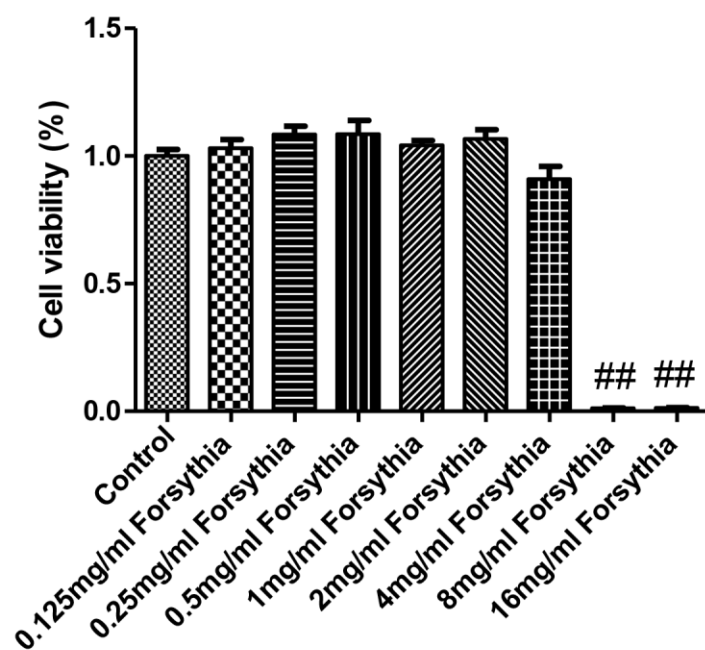

Figure S1 Effect of *Forsythia suspense* extract on cell viability. The results are shown as the mean  $\pm$  SEM. ##  $P < 0.01$  compared with the control group
